# Supplementary material
Source: PubMed Central journal article supplement (PMC3281704)
Supplement: supp_M111.311688_jbc.M111.311688-1.pdf [file supp_M111.311688_jbc.M111.311688-1.pdf]

SUPPLEMENTARY DATA

Figure S1

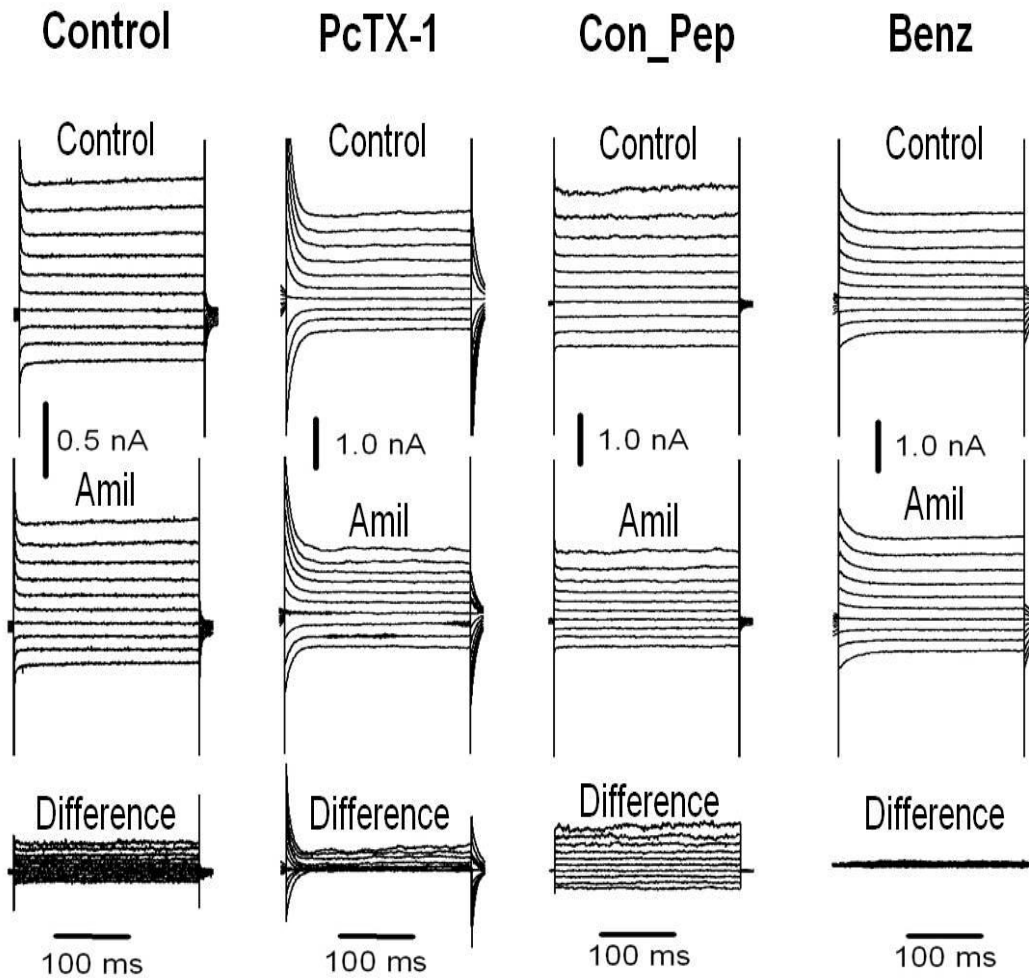

**Whole cell patch clamp recording of D54-MG cells treated with PcTX-1, control peptide, and benzamil for 24h.** Representative traces of whole cell patch clamp recording of D54-MG cells showing the basally active whole cell current (top traces), current after perfusion of 100 $\mu$ M amiloride to the bath solution (middle traces), amiloride sensitive difference current (bottom traces). Current-voltage relationships were obtained using a pulse protocol in which cells were stepped from a -40 mV holding potential from -100 to +80 mV in 20 mV increments for 250 ms. There was a significant difference in amiloride sensitive current in control cells or control peptide pretreated cells as compared to the currents recorded from cells pretreated with PcTx-1 and benzamil.

Figure S2

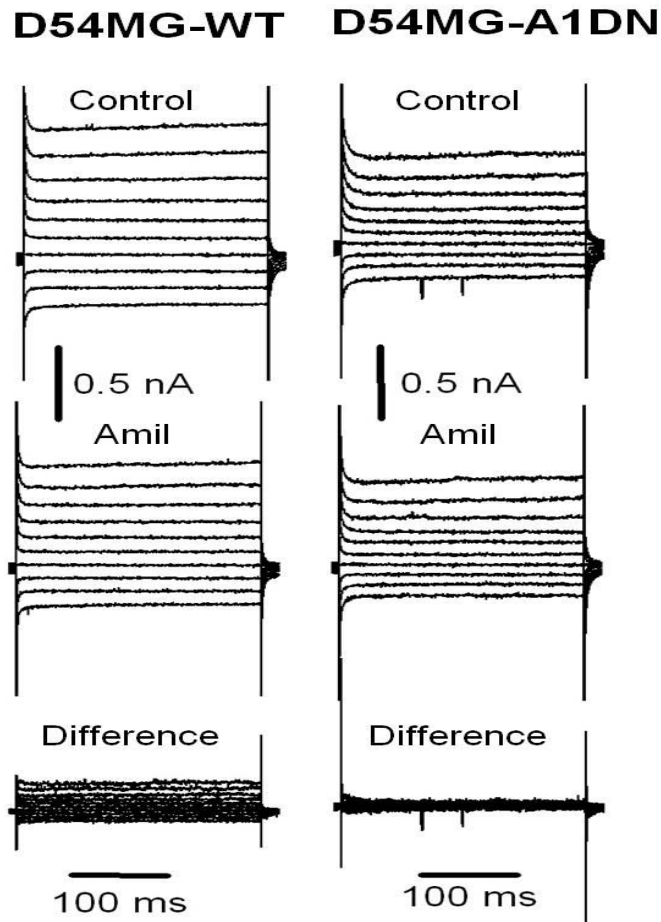

Representative whole cell patch clamp recordings of wild type D54MG (D54MG-WT) and D54-MG cells stably transfected with DN eGFP-ASIC1 cDNA (D54MG-A1DN) showing the basally active whole cell current (top traces), current after perfusion of 100 $\mu$ M amiloride to the bath solution (middle traces), amiloride sensitive difference current (bottom traces). Current-voltage relationships were obtained using a pulse protocol in which cells were stepped from a -40 mV holding potential from -100 to +80 mV in 20 mV increments for 250 ms.

Figure S3

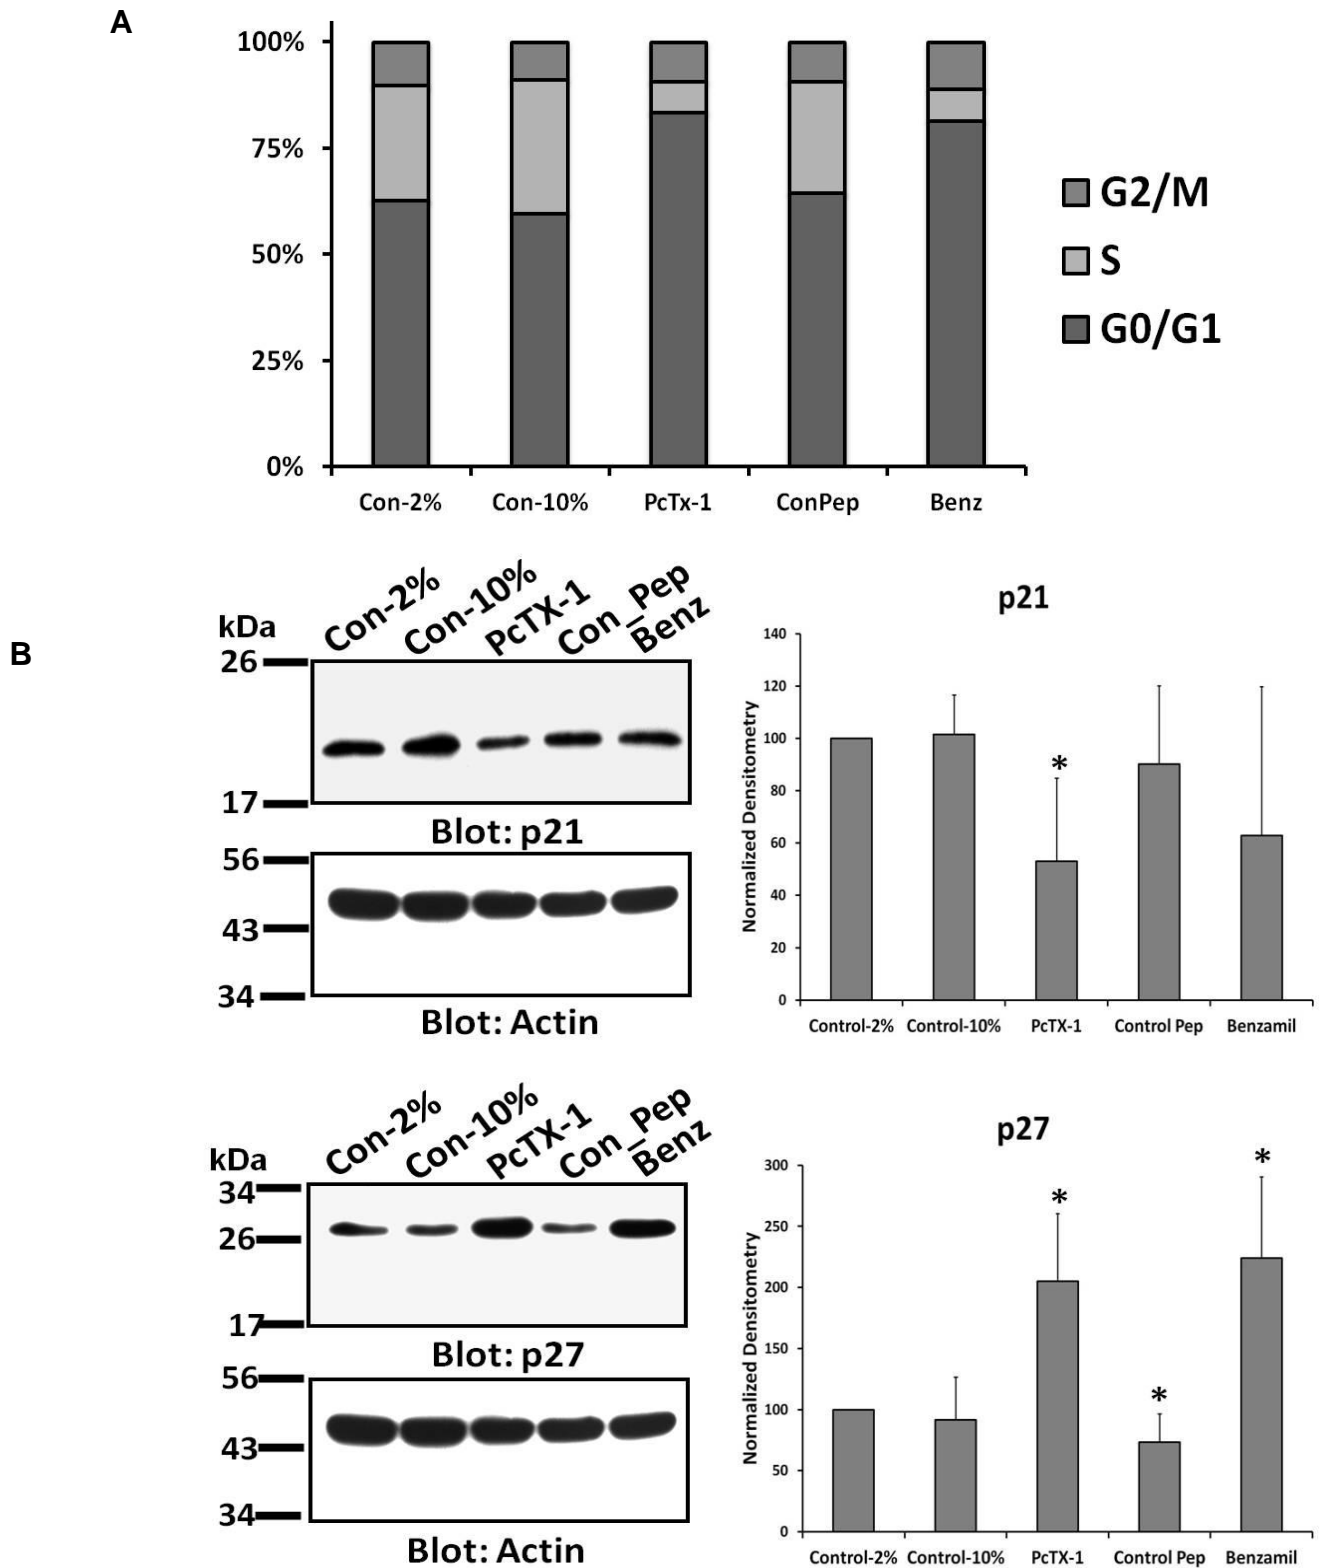

**Inhibition of glioma conductance caused cell cycle arrest in U87MG cells** **A.** The stacked bar graph shows the percentage of U87MG cells in each cell cycle phase for different experimental conditions. Values are mean  $\pm$  S. D. (n=5). **B.** PcTx1 and benzamil increased expression of p27<sup>kip1</sup> following 24h incubation, but had no effect on the expression of p21<sup>cip1</sup> (n=4). The blots were stripped and reprobbed with  $\beta$ -actin for loading control. Each bar represents the normalized density compared to control with 2% FBS.

Figure S4

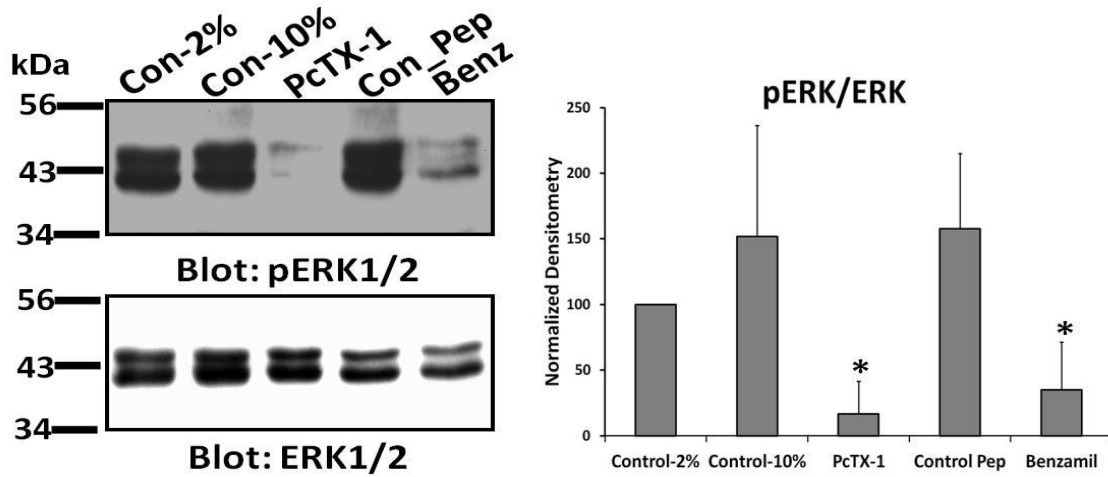

**Inhibition of glioma conductance inhibited ERK1/2 phosphorylation in U87MG cells.** The phosphorylation of ERK1/2 was significantly reduced in PcTX-1 (by  $83 \pm 25\%$ ,  $n=4$ ) or benzamil (by  $65 \pm 36\%$ ,  $n=4$ ) treated U87MG cells. Each bar represents the normalized density compared to control with 2% FBS.

Figure. S5

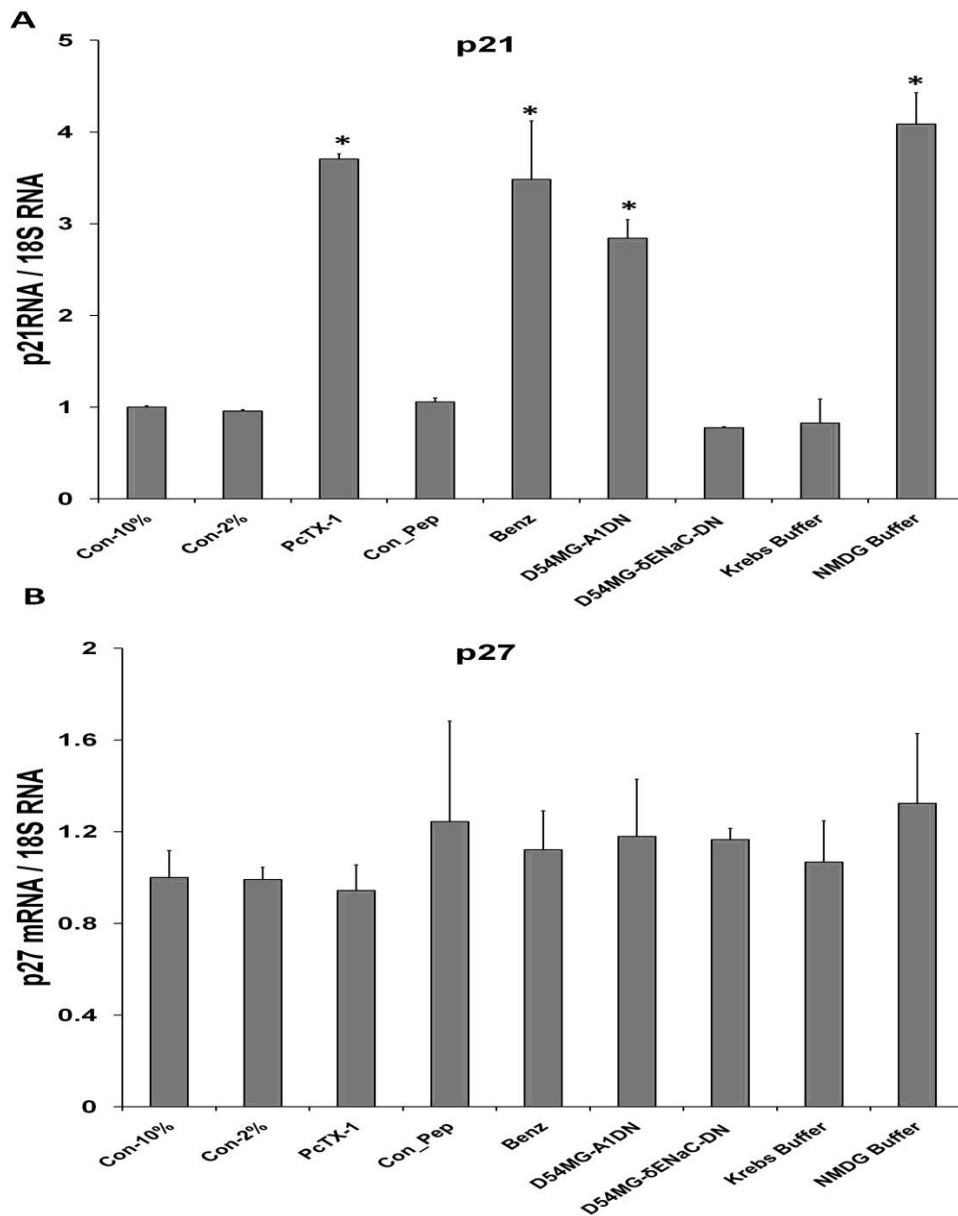

**Real-time PCR of p21<sup>Cip1</sup> and p27<sup>Kip1</sup> from D54-MG cells.** This figure shows average relative mRNA expression for different conditions proportional to 18S rRNA in D54-MG cells. Expression for p21<sup>Cip1</sup> (**A**) is significantly higher (n=4) in cells treated with either PcTX-1 (100nM), or benzamil (100 $\mu$ M) or incubated in low [Na<sup>+</sup>] buffer for 24h as compared to D54-MG cells. The expression of p21<sup>Cip1</sup> was also increased by knock-down of ASIC-1, but not the  $\delta$ ENaC subunit. The results are the averages of four different samples run in duplicate. The mRNA level for p27<sup>Kip1</sup> (**B**) were unchanged by the same experimental maneuvers (n=4).
